# A New Simple Method for the Measurement of Visceral Fat Accumulation by Bioelectrical Impedance

MIWA RYO, MD<sup>1</sup>  
KAZUHISA MAEDA, MD<sup>1,2</sup>  
TOMOHIRO ONDA, PHD<sup>3</sup>  
MITSUHIRO KATASHIMA, MS<sup>3</sup>  
AKIKO OKUMIYA, PHD<sup>4</sup>  
MAKOTO NISHIDA, MD<sup>1</sup>

TOHRU YAMAGUCHI, MS<sup>3</sup>  
TOHRU FUNAHASHI, MD<sup>1</sup>  
YUJI MATSUZAWA, MD<sup>5</sup>  
TADASHI NAKAMURA, MD<sup>1</sup>  
ICHIRO SHIMOMURA, MD<sup>1</sup>

**W**e and others (1–9) have shown that the accumulation of visceral fat is associated with multiple risk factor syndrome more closely than with the BMI itself or the amount of subcutaneous fat. In these studies, computed tomography (CT) scan at the umbilical level (10) was used for the assessment of visceral fat area (VFA). However, the method is not cost-effective and/or radiation exposure is problematic; thus, it is often unsuitable for screening large groups of individuals. There is a need for a simple and noninvasive method to assess visceral fat accumulation. The bioelectrical impedance analysis (BIA) method, which is based on the electric resistance difference between the fat and components of other organs (11–14), should meet this need. Conventional BIA approaches have estimated total fat content but not regional fat distribution (11–13). Recently, attempts to assess the amount of abdominal subcutaneous fat by the local BIA method were reported (14). Here, we developed a new technique to specifically evaluate VFA by using the abdominal BIA method.

## RESEARCH DESIGN AND METHODS

The study subjects were 59 healthy volunteers and 32 inpatients with suspected cardiovascular disease at Osaka University Hospital. Waist circumference (Wc) at the umbilical level was measured in the late exhalation phase while standing. All subjects underwent the abdominal BIA method to estimate VFA. The voltage occurring at the flank to the flow of current between the umbilicus and the back correlates significantly with VFA and is unaffected by subcutaneous fat area. The voltage becomes larger as visceral fat accumulates even in the subjects with the same Wc because the electric resistance of intra-abdominal fat is greater than that of fat-free mass, and the density of the equipotential lines between two electrodes becomes denser (15) (Fig. 1A). The voltage correlates with the ratio of VFA to the total cross-sectional area of the abdomen, which can be approximated by using  $Wc^2$  (Fig. 1B). Thus, the VFA can be expressed as

$$VFA = a_0 + a_1 Vo' Wc^2 \quad (1)$$

where  $a_0$  and  $a_1$  are constants and  $Vo'$  is the voltage measured at the flank. Equation 1 means that the distance between two measuring electrodes on the flank must change in proportion to Wc. The voltage  $Vo'$  used in equation 1 can be approximately related to the voltage  $Vo$  measured with the electrodes with a fixed distance in the form of

$$Vo' = b Wc Vo \quad (2)$$

where  $b$  is a constant. Hence, substituting equation 2 into equation 1, we obtain

$$VFA = a_0 + a_1' Vo Wc^3 \quad (3)$$

where  $a_1'$  is a constant. Then, we calculate presumed VFA by using linear regression equation for volunteers and patients. The correlation between presumed VFA and VFA determined by CT and the effects of posture and respiration on abdominal BIA were investigated. The usefulness of abdominal BIA on evaluating metabolic syndrome was also investigated. Factors characteristic for the metabolic syndrome were defined as follows. Hypertriglyceridemia: serum triglyceride concentration  $\geq 150$  mg/dl and/or on medication; low HDL cholesterol: serum HDL cholesterol concentration  $< 40$  mg/dl; hypertension: systolic blood pressure  $\geq 130$  mmHg and/or diastolic blood pressure  $\geq 85$  mmHg and/or having received antihypertensive medication; and high fasting glucose: serum glucose concentration  $\geq 110$  mg/dl and/or having received antidiabetic medication. In the Japanese subjects, the best combination of sensitivity and specificity for detecting subjects with multiple risk factors was VFA level  $\geq 100$  cm<sup>2</sup> (3). All statistical analysis was performed with Stat View J 5.0 (SAS). The  $\chi^2$  test and Mann-Whitney's  $U$  test were used to compare the risk factors between two groups: the high and normal VFA groups.

**RESULTS** — The VFA presumed by abdominal BIA correlated significantly with VFA determined by CT ( $r = 0.88$ ,  $P < 0.0001$ ) (Fig. 1C). This correlation

From the <sup>1</sup>Department of Internal Medicine and Molecular Science, Graduate School of Medicine, Osaka University, Suita, Osaka, Japan; the <sup>2</sup>Medical Center for Translational Research, Osaka University Hospital, Suita, Osaka, Japan; the <sup>3</sup>Kao Corporation, Tokyo, Japan; the <sup>4</sup>Area of Nursing Science, Course of Health Science, Graduate School of Medicine, Osaka University, Suita, Osaka, Japan; and <sup>5</sup>Sumitomo Hospital, Osaka, Japan.

Address correspondence and reprint requests to Miwa Ryo, MD, Department of Internal Medicine and Molecular Science, Graduate School of Medicine, Osaka University, 2-2 Yamadaoka, Suita, Osaka 565-0871, Japan. E-mail: ryomw@gaia.eonet.ne.jp.

Received for publication 9 November 2004 and accepted 10 November 2004.

**Abbreviations:** BIA, bioelectrical impedance analysis; CT, computed tomography; VFA, visceral fat area; Wc, waist circumference.

A table elsewhere in this issue shows conventional and Système International (SI) units and conversion factors for many substances.

© 2005 by the American Diabetes Association.

The costs of publication of this article were defrayed in part by the payment of page charges. This article must therefore be hereby marked "advertisement" in accordance with 18 U.S.C. Section 1734 solely to indicate this fact.

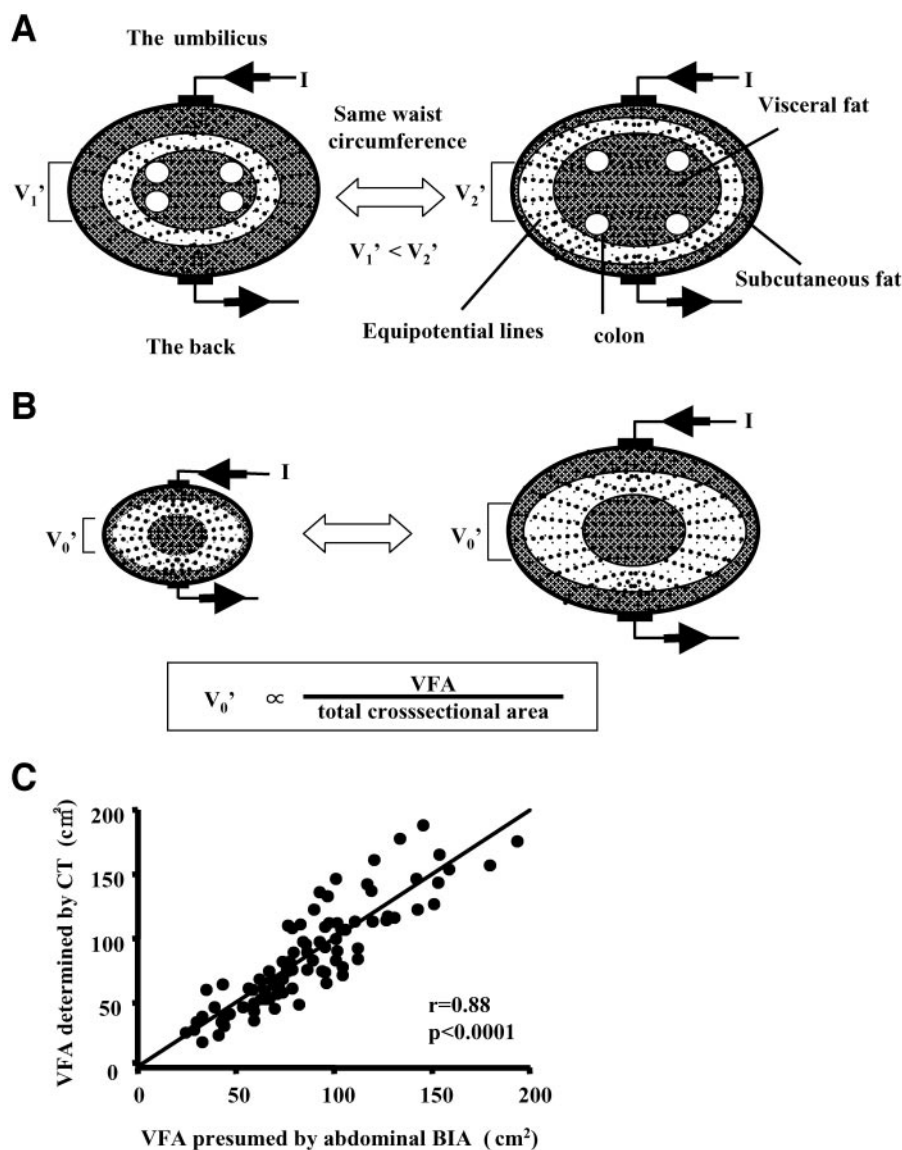

**Figure 1**—Abdominal bioelectrical impedance analysis (BIA) method. (A) The electric current (I) flows across the abdomen between the umbilicus and the back. Equipotential lines, form inside the peritoneal cavity, penetrate the visceral fat and emerge on the body surface at the flank. The voltage ( $V_1'$ ,  $V_2'$ ) measured at the flank becomes large with accumulation of visceral fat. (B) The voltage ( $V_0'$ ) measured at the flank correlates with the ratio of visceral fat area (VFA) to the total cross-sectional area of the abdomen. (C) Correlation between VFA presumed by abdominal BIA and VFA determined by computed tomography (CT) ( $n = 91$ ). Voltage measurement condition was the standing-late exhalation.

was significantly stronger than those between VFA determined by CT and Wc ( $r = 0.77$ ), BMI ( $r = 0.62$ ), and percent body fat  $\times$  weight ( $r = 0.73$ – $0.76$ ) measured by the conventional BIA method based on induction between both hands (HBF-302; Omron, Kyoto, Japan) and both feet (TF-701; Tanita, Tokyo, Japan). In considering the reproducibility and correlation, the best measurement condition was the standing posture and late ex-

halation in both sexes (data not shown). The high VFA group (presumed VFA  $\geq 100$   $\text{cm}^2$ ) showed a higher prevalence of hypertriglyceridemia (48.3 vs. 12.9%,  $P < 0.001$ ), low HDL cholesterol (17.2 vs. 11.3%), high fasting glucose (13.8 vs. 9.7%), and hypertension (24.1 vs. 22.6%) than the normal VFA group ( $< 100$   $\text{cm}^2$ ). The number of risk factors was also significantly higher in the high VFA group than the normal VFA group

(no risk factor: 37.9 vs. 61.3%, single risk factor: 24.1 vs. 22.6%, two risk factors: 24.1 vs. 12.9%, and three risk factors: 13.8 vs. 3.2%,  $P < 0.05$ ).

**CONCLUSIONS**—Conventionally, Wc is a well-used anthropometric measure for the assessment of visceral fat. Furthermore, the criteria for the metabolic syndrome according to National Cholesterol Education Program (16) include Wc. In fact, Wc correlates with VFA determined by CT (3,9,17). However, these parameters are considerably variable among individuals. It has been reported (3), for example, that men with Wc between 85.0 and 86.0 cm had VFA in the range of 67 and 137  $\text{cm}^2$  in a Japanese population. Furthermore, in premenopausal women, Wc underestimates visceral fat amount because of the accumulation of abdominal subcutaneous fat (18). For the above reason, we decided to develop a new method that is simple and accurately measures VFA.

Our new method using BIA is quite simple and noninvasive for evaluation of visceral fat amount. The time required for measurement is only a few minutes, and the instrument is inexpensive and portable. This method requires no advanced skills on the part of the operator, and, on the other hand, subject cooperation is minimal. Excellent correlation was observed in the estimation of visceral fat accumulation between abdominal BIA method and CT. Indeed, the prevalence of multiple risk factors was significantly higher in the high VFA group than in the normal VFA group.

Collectively, the abdominal BIA method should become a useful instrument in routine clinical practice for the evaluation of visceral fat accumulation associated with the metabolic syndrome.

**Acknowledgments**—We are grateful to Dr. Kazuo Maki and Masaki Fukuhara of Kao Corporation for their assistance in developing the visceral fat-measuring apparatus and Dr. Masahiko Takahashi and Dr. Kikuko Hotta for their great help in measuring VFA by the abdominal BIA method at Osaka University Hospital.

## References

1. Nakamura T, Tokunaga K, Shimomura I, Nishida M, Yoshida S, Kotani K, Islam AHMW, Keno Y, Kobatake T, Nagai Y,

- Fujioka S, Tarui S, Matsuzawa Y: Contribution of visceral fat accumulation to the development of coronary artery disease in non-obese men. *Atherosclerosis* 107:239–246, 1994
2. Matsuzawa Y, Nakamura T, Shimomura I, Kotani K: Visceral fat accumulation and cardiovascular disease. *Obes Res* 3 (Suppl. 5):645S–647S, 1995
3. The Examination Committee of Criteria for “Obesity Disease” in Japan, Japan Society for the Study of Obesity: New criteria for “obesity disease” in Japan. *Circ J* 66:987–992, 2002
4. Pascot A, Despres JP, Lemieux I, Bergeron J, Nadeau A, Prud’homme D, Tremblay A, Lemieux S: Contribution visceral obesity to the deterioration of the metabolic risk profile in men with impaired glucose tolerance. *Diabetologia* 43:1126–1135, 2000
5. Pascot A, Despres JP, Lemieux I, Almeras N, Bergeron J, Nadeau A, Prud’homme D, Tremblay A, Lemieux S: Deterioration of the metabolic risk profile in women. *Diabetes Care* 24:902–908, 2001
6. Fujimoto WY, Bergstrom RW, Boyko EJ, Chen KW, Leonetti DL, Newell-Morris L, Shofer JB, Wahl PW: Visceral adiposity and incident heart disease in Japanese-American men: the 10-year follow-up results of the Seattle Japanese-American Community Diabetes Study. *Diabetes Care* 22:1808–1812, 1999
7. Boyko EJ, Fujimoto WY, Leonetti DL, Newell-Morris L: Visceral adiposity and risk of type 2 diabetes: a prospective study among Japanese Americans. *Diabetes Care* 23:465–471, 2000
8. Hatashi T, Boyko EJ, Leonetti DL, McNeely MJ, Newell-Morris L, Kahr SE, Fujimoto WY: Visceral adiposity and the prevalence of hypertension in Japanese Americans. *Circulation* 108:1718–1723, 2003
9. Ryo M, Nakamura T, Kihara S, Kumada M, Shibazaki S, Takahashi M, Nagai M, Matsuzawa Y, Funahashi T: Adiponectin as a biomarker of the metabolic syndrome. *Circ J* 68:975–981, 2004
10. Yoshizumi T, Nakamura T, Yamane M, Isram AHMW, Menju M, Yamasaki K, Arai T, Kotani K, Funahashi T, Yamashita S, Matsuzawa Y: Abdominal fat: standardized technique for measurement at CT. *Radiology* 211:283–286, 1999
11. Lukaski HC, Johnson PE, Bolonchuk WW, Lykken GI: Assessment of fat-free mass using bioelectrical impedance measurements of the human body. *Am J Clin Nutr* 41:810–817, 1985
12. Lukaski HC, Bolonchuk WW, Hall CB, Siders A: Validation of tetrapolar bioelectrical impedance method to assess human body composition. *J Appl Physiol* 60:1327–1332, 1986
13. Nakadomo F, Tanaka K, Hazama T, Maeda K: Validation of body composition assessed by bioelectrical impedance analysis. *Jpn J Appl Physiol* 20:321–330, 1990
14. Scharfetter H, Schlager T, Stollberger R, Felsberger R, Hutten H, Hinghofer-Szalkay H: Assessing abdominal fatness with local bioimpedance analysis: basics and experimental findings. *Int J Obes* 25:502–511, 2001
15. Geddes LA, Baker LE: The specific resistance of biological material: a compendium of data for the biomedical engineer and physiologist. *Med Biol Eng* 5:271–293, 1967
16. Expert Panel on Detection, Evaluation, and Treatment of High Blood Cholesterol in Adults: Executive Summary of the Third Report of the National Cholesterol Education Program (NCEP) Expert Panel on Detection, Evaluation, and Treatment of High Blood Cholesterol in Adults (Adult Treatment Panel III). *JAMA* 285:2486–2497, 2001
17. Rankinen T, Kim SY, Perusse L, Despres JP, Bouchard C: The prediction of abdominal visceral fat level from body composition and anthropometry: ROC analysis. *Inter J Obes* 23:801–809, 1999
18. Kotani K, Tokunaga K, Fujioka S, Kobatake T, Keno Y, Yoshida S, Shimomura I, Tarui S, Matsuzawa Y: Sexual dimorphism of age-related changes in whole-body fat distribution in the obese. *Int J Obes* 18:207–212, 1994
